# Supplementary material for: A transparent Ti4+ doped hematite photoanode protectively grown by a facile hydrothermal method
Source: Royal Society of Chemistry journal article supplement (doi:10.1039/c3ce26811j), 2013-01-01
Supplement: c3ce26811j.pdf [file c3ce26811j.pdf]

## Supporting Information

### A $\text{Ti}^{4+}$ doped hematite photoanode protectively grown by a facile hydrothermal method

Dapeng Cao,<sup>ab</sup> Wenjun Luo,<sup>\*ac</sup> Mingxue Li,<sup>a</sup> Jianyong Feng,<sup>ab</sup> Zhaosheng Li<sup>abc</sup> and Zhigang Zou<sup>\*ac</sup>

<sup>a</sup>Ecomaterials and Renewable Energy Research Center, National Laboratory of Solid State Microstructures, Nanjing University, Nanjing 210093, China.

<sup>b</sup>College of Engineering and Applied Science, Nanjing University, Nanjing 210093, China.

<sup>c</sup>Kunshan Innovation Institute of Nanjing University, Kunshan, 215347, China.)

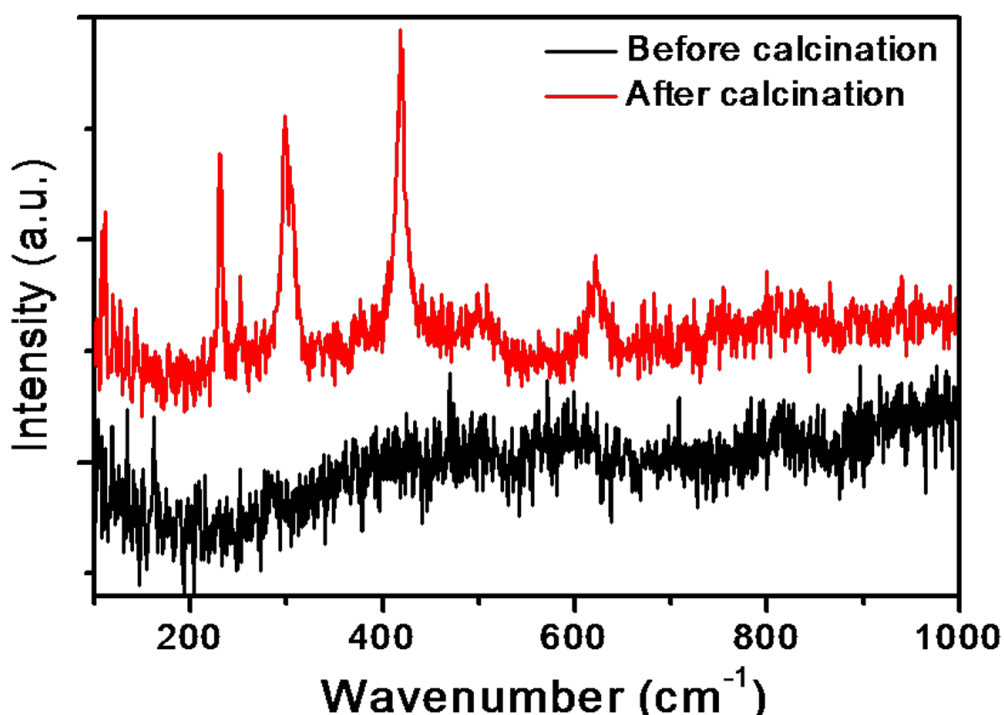

Fig. S1 Raman spectra of the  $\text{Fe}_2\text{O}_3$  electrodes before and after calcination.

---

\* Authors to whom correspondence should be addressed, e-mail: [wjluo@nju.edu.cn](mailto:wjluo@nju.edu.cn) and [zgrou@nju.edu.cn](mailto:zgrou@nju.edu.cn)

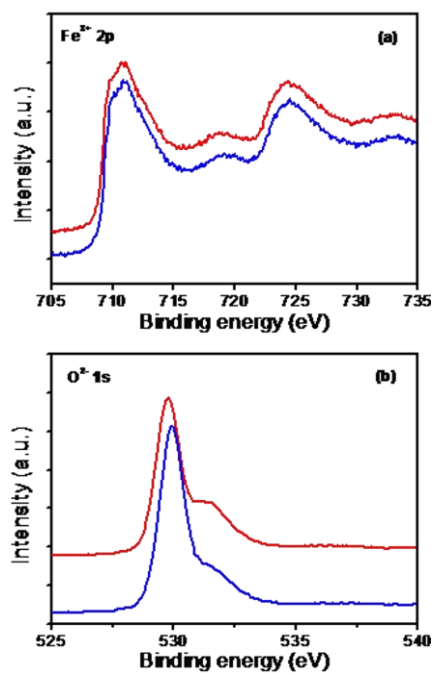

Fig. S2 Binding energy of Fe<sup>3+</sup> 2p and O<sup>2-</sup> 1s on the samples prepared at 70 min after calcination in the two different solutions with (blue line) and without (red line) Ti<sup>4+</sup>.

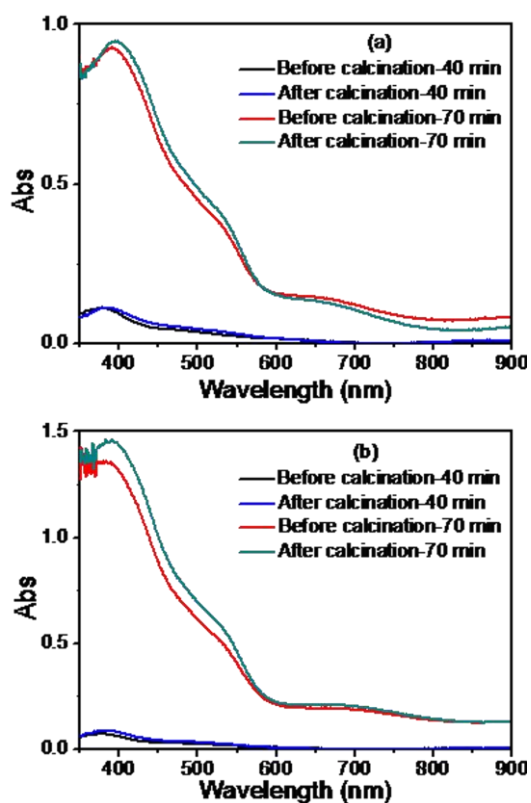

Fig. S3 UV-vis absorption spectra of films: (a) pure samples and (b) doped samples before and after calcination.

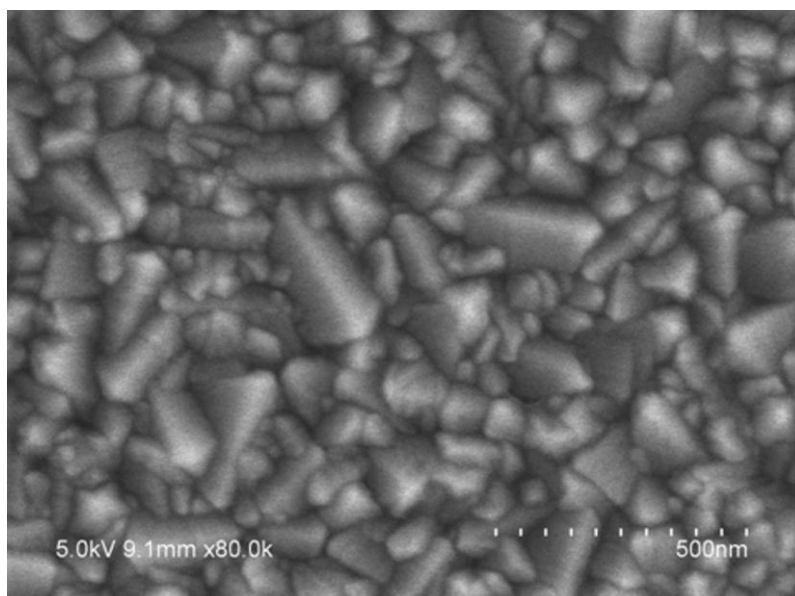

Fig. S4 SEM image of bare FTO

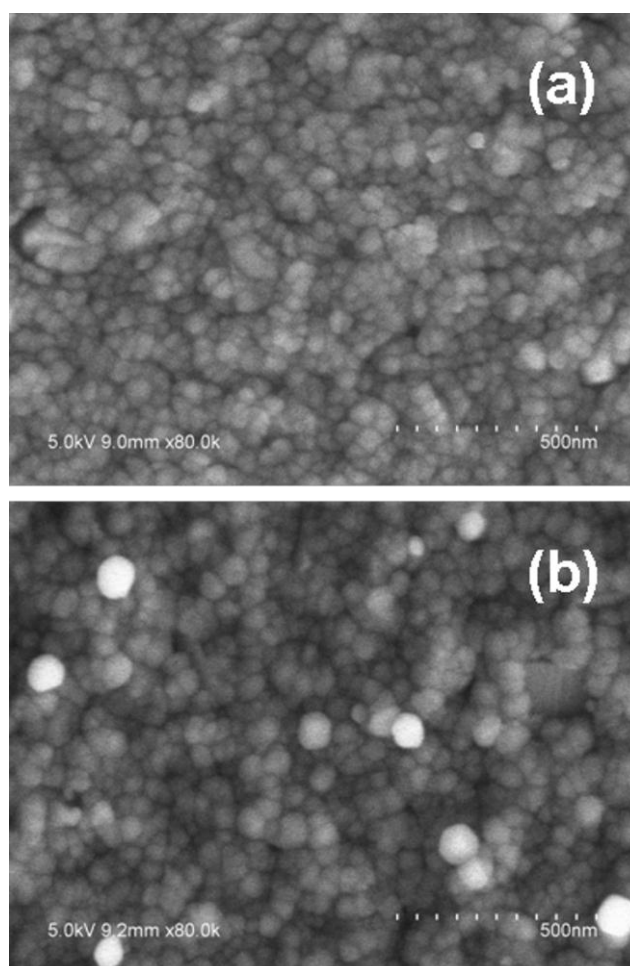

Fig. S5 SEM images of the samples after calcination at 70 min in (a) the solution without  $\text{Ti}^{4+}$  and (b) the solution with  $\text{Ti}^{4+}$ .
